# Supplementary material
Source: Springer Nature journal article supplement (https://www.springermedizin.de/resource/supplementary/12987_2007_291_MOESM12_ESM.pdf/9611698)
Supplement: MOESM12 [file 9611698]

# MAJOR TRANSPORT INTERFACES in CNS

**Endothelial** transport: glucose, amino acids, FFA; peptides

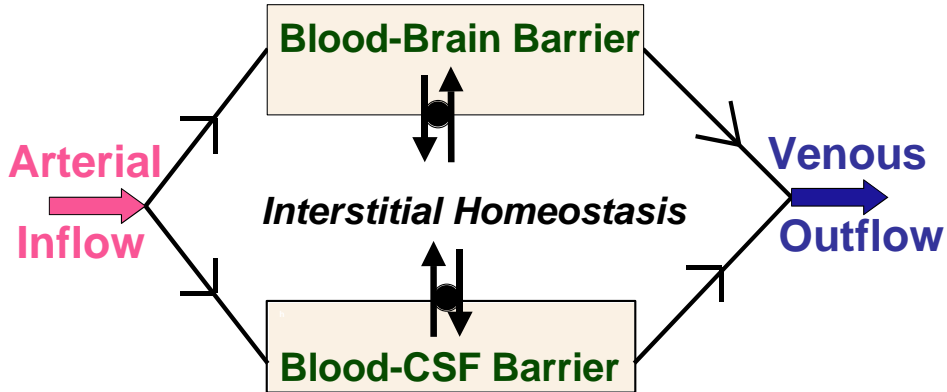

**Epithelial** transport: growth factors; vitamins B & C; hormones

**Bidirectional Transport at Barriers:**  
*Inward* Secretion & *Outward* Reabsorption
